# Supplementary material for: Targeting the Intestinal Microbiota to Prevent Type 2 Diabetes and Enhance the Effect of Metformin on Glycaemia: A Randomised Controlled Pilot Study
Source: PubMed Central journal article supplement (PMC7400852; doi:10.3390/nu12072041), 2020-07-09
Supplement: nutrients-12-02041-s001.pdf [file nutrients-12-02041-s001.pdf]

1

## Supplementary information

2 **Table S1.** Outcome measures by treatment group and within participants taking metformin.

| Parameter                | Time-point | All Participants |                | Participants on metformin |                |
|--------------------------|------------|------------------|----------------|---------------------------|----------------|
|                          |            | Probiotic (N=30) | Placebo (N=30) | Probiotic (N=14)          | Placebo (N=14) |
| Weight (kg)              | Baseline   | 100.1±20.4       | 101.7±21.9     | 97.6±21.9                 | 101.0±20.6     |
|                          | Week 12    | 97.5±21.2        | 100.8±22.8     | 91.7±23.9                 | 99.5±22.2      |
| BMI (kg/m <sup>2</sup> ) | Baseline   | 35.5±6.20        | 36.3±7.5       | 35.0±6.1                  | 35.6±8.2       |
|                          | Week 12    | 34.5±6.3         | 36.0±7.8       | 32.3±6.5                  | 35.1±8.8       |
| Waist (cm)               | Baseline   | 114.7±12.9       | 114.3±14.7     | 113.7±13.6                | 113.4±12.8     |
|                          | Week 12    | 114.3±16.0       | 116.0±17.1     | 109.4±18.0                | 116.1±16.2     |
| Waist:Hip                | Baseline   | 0.97±0.06        | 0.95±0.07      | 1.0±0.1                   | 1.0±0.1        |
|                          | Week 12    | 0.97±0.06        | 0.98±0.72      | 0.9±0.1                   | 1.0±0.1        |
| Body fat (%)             | Baseline   | 37.7±8.2         | 41.8±7.9       | 39.5±9.1                  | 40.3±7.8       |
|                          | Week 12    | 38.1±7.8         | 40.9±8.4       | 37.3±8.5                  | 38.9±8.7       |
| Systolic BP (mmHg)       | Baseline   | 133.0±10.8       | 127.8±12.5     | 134.5±14.4                | 130.4±12.3     |
|                          | Week 12    | 128.5±12.5       | 127.0±13.1     | 129.0±17.9                | 127.5±11.3     |
| Diastolic BP (mmHg)      | Baseline   | 79.8±7.3         | 81.6±6.3       | 79.4±6.5                  | 83.7±5.8       |
|                          | Week 12    | 78.5±5.8         | 81.6±7.3       | 78.0±6.6                  | 82.6±6.1       |
| TC (mmol/L)              | Baseline   | 4.9±1.1          | 5.4±1.3        | 4.7±1.0                   | 5.1±1.1        |
|                          | Week 12    | 4.9±1.1          | 5.3±1.4        | 4.4±0.9                   | 4.7±0.8        |
| HDL-c (mmol/L)           | Baseline   | 1.2±0.3          | 1.3±0.2        | 1.3±0.3                   | 1.3±0.2        |
|                          | Week 12    | 1.2±0.3          | 1.2±0.2        | 1.2±0.3                   | 1.2±0.2        |
| LDL-c (mmol/L)           | Baseline   | 2.8±1.1          | 3.2±1.0        | 2.7±0.9                   | 3.0±1.1        |
|                          | Week 12    | 2.9±1.1          | 3.2±1.1        | 2.4±1.0                   | 2.7±0.8        |
| Triglycerides (mmol/L)   | Baseline   | 1.8±0.9          | 1.9±1.2        | 1.7±0.8                   | 1.6±0.8        |
|                          | Week 12    | 1.7±0.7          | 2.1±1.3        | 1.6±0.9                   | 1.6±0.6        |
| FFA (µmol/L)             | Baseline   | 608.5±296.4      | 647.8±234.9    | 687.1±345.8               | 651.1±248.4    |
|                          | Week 12    | 618.0±219.1      | 642.0±183.2    | 714.6±195.2               | 621.6±229.3    |
| hs-CRP (mg/L)            | Baseline   | 3.9±4.1          | 3.0±2.4        | 4.7±4.1                   | 5.5±9.1        |
|                          | Week 12    | 4.1±4.7          | 4.3±6.2        | 5.4±5.8                   | 5.5±10.3       |
| LPS (EU/mL)              | Baseline   | 0.5±0.2          | 0.6±0.3        | 0.5±0.3                   | 0.5±0.3        |
|                          | Week 12    | 0.5 ± 0.2        | 0.5±0.2        | 0.5±0.2                   | 0.5±0.2        |
| Zonulin (mg/dL)          | Baseline   | 203.6±171.9      | 207.8±172.9    | 291.0±211.3               | 233.9±239.0    |
|                          | Week 12    | 166.7 ± 112.6    | 136.3±79.9     | 197.9±119.3 <sup>a*</sup> | 151.6±71.8     |

3 Data are means ± SD or median (IQR). Difference between baseline and endpoint. P value obtained  
4 from repeated measure ANOVA<sup>a</sup> or Wilcoxon matched-pairs signed rank test<sup>b</sup> for the within-group  
5 comparisons. \**p* < 0.05. BMI: body mass index; BP: blood pressure; TC: total cholesterol; HDL-c: high-  
6 density lipoprotein cholesterol; LDL: low-density lipoprotein cholesterol; FFA: free fatty acids; hs-CRP:  
7 high-sensitive C-reactive protein; LPS: lipopolysaccharide.

8

9

10

11 **Table S2.** Plasma SCFA concentrations by treatment group within the participants on metformin  
 12

|             |            | All participants        |                | Participants on metformin |                |
|-------------|------------|-------------------------|----------------|---------------------------|----------------|
| SCFA (μM)   | Time-point | Probiotic (N=30)        | Placebo (N=30) | Probiotic (N=13)          | Placebo (N=14) |
| Propionate  | Baseline   | 60.7 (70.0)             | 56.6 (85.2)    | 50.2 (57.4)               | 56.6 (83.8)    |
|             | Week 12    | 89.2 (79.8)             | 99.6 (80.1)    | 85.3 (80.3)               | 99.6 (81.6)    |
| Isobutyrate | Baseline   | 6.1 (8.4)               | 6.0 (11.2)     | 5.4 (6.9)                 | 6.0 (6.0)      |
|             | Week 12    | 6.9 (17.0)              | 7.0 (11.7)     | 6.6 (9.8)                 | 7.0 (7.1)      |
| Butyrate    | Baseline   | 4.3 (4.9)               | 3.5 (7.3)      | 3.2 (4.3)                 | 3.5 (5.3)      |
|             | Week 12    | 5.8 (8.3) <sup>a*</sup> | 6.5 (7.8)      | 6.3 (9.1) <sup>a*</sup>   | 6.9 (4.6)      |
| Isovalerate | Baseline   | 0.4 (2.2)               | 0.1 (2.1)      | 0.0 (1.1)                 | 0.1 (1.6)      |
|             | Week 12    | 0.9 (4.7)               | 1.2 (3.6)      | 1.4 (3.0)                 | 1.1 (5.8)      |
| Total       | Baseline   | 72.3 (86.6)             | 62.9 (111.1)   | 60.2 (67.3)               | 62.9 (95.6)    |
|             | Week 12    | 103.3 (113.3)           | 120.4 (99.3)   | 100.0 (102.4)             | 114.5 (98.2)   |

13 Data are median (IQR). <sup>a</sup>Difference between baseline and endpoint. P value obtained from Wilcoxon  
 14 matched-pairs signed rank test for the within-group comparisons. \* $p < 0.05$

15  
 16  
 17

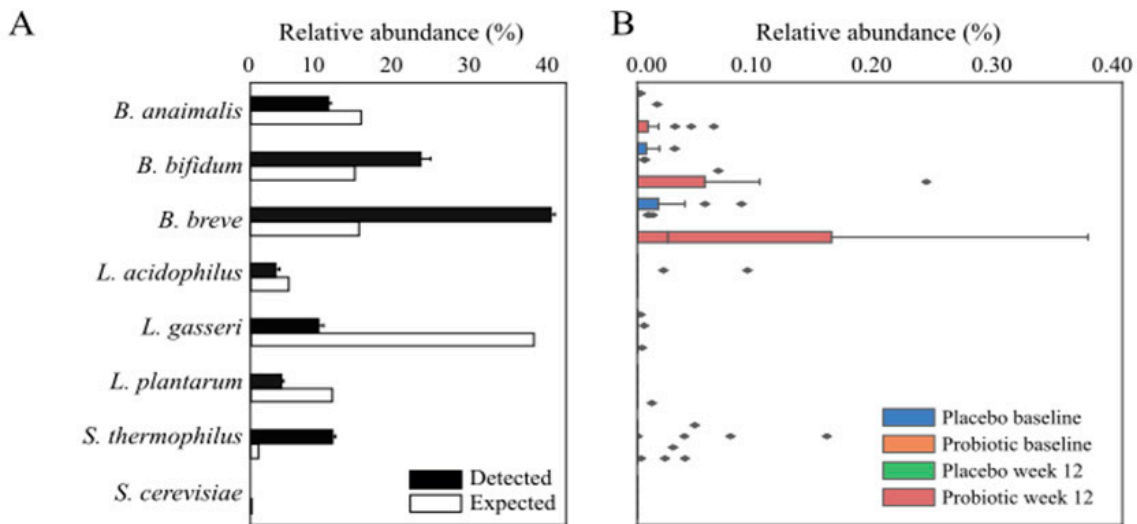

18  
 19  
 20 **Figure S1.** Probiotic detection and quality control. **A.** Comparison of the relative abundance of species  
 21 in the capsule between the target formulation (Expected) and shotgun metagenomic sequencing  
 22 (Detected, n=2). **B.** Relative abundance of probiotic species found in the study groups at baseline and  
 23 after the 12-week intervention.  
 24

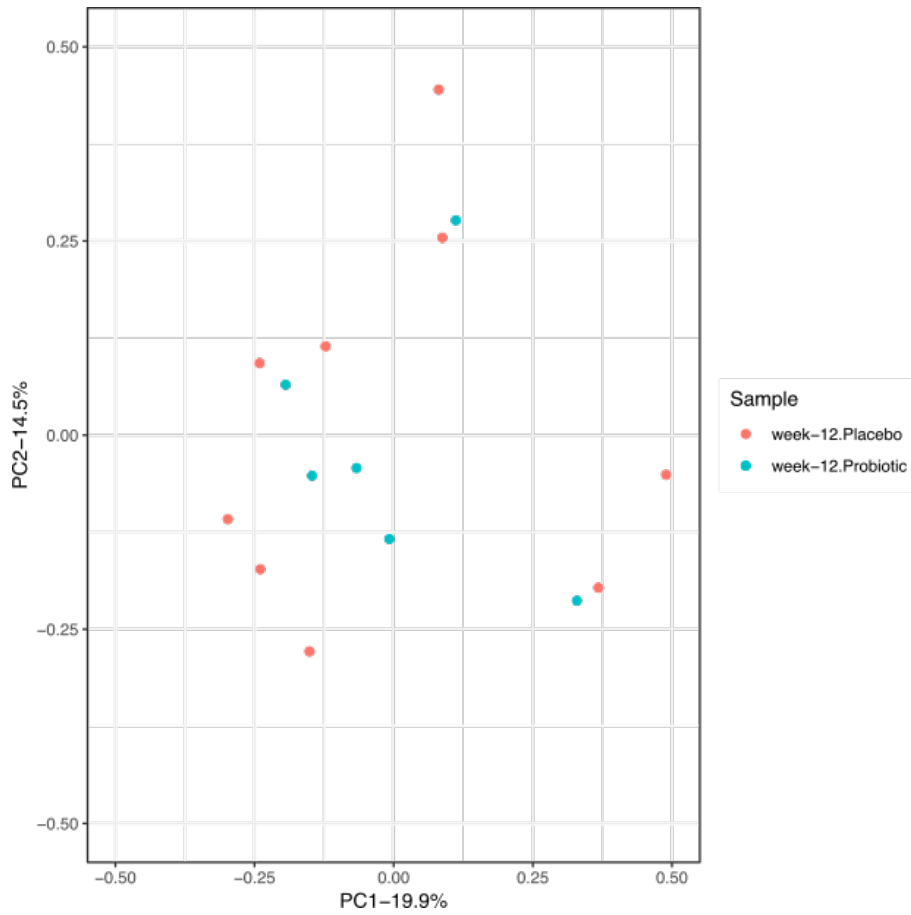

25

26 **Figure S2.** PCoA of Bray-Curtis distances between intestinal microbial communities of probiotics and  
 27 placebo groups in Metformin treated group after 12 weeks of intervention.

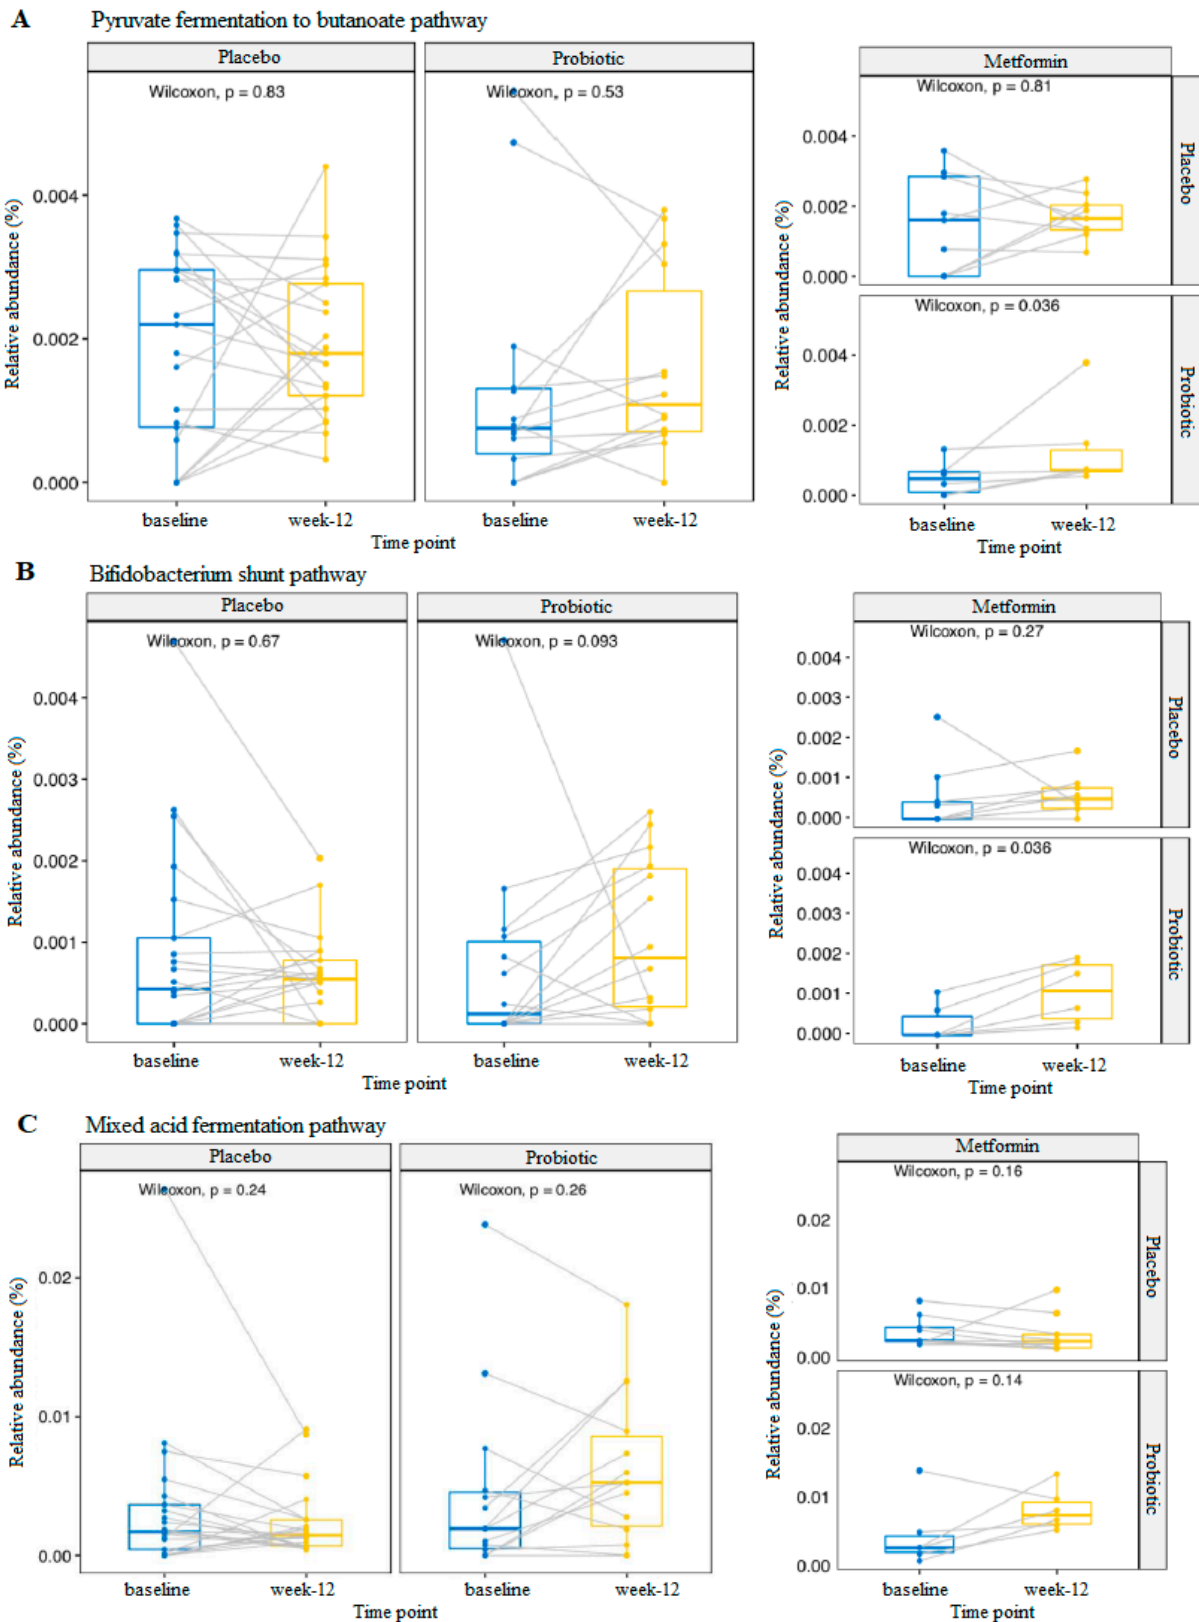

28

29 **Figure S3.** Relative abundance of SCFA-producing pathways in the faecal microbiota of participants in the intervention and metformin groups.  
 30  
 31
